# Supplementary material for: 2D-BCNO with Eu3+: partial energy transfer and direct natural white light for LEDs
Source: Royal Society of Chemistry journal article supplement (doi:10.1039/c9nj02280e), 2019-01-01
Supplement: c9nj02280e1.pdf [file c9nj02280e1.pdf]

**Electronic Supplementary Information (ESI) for New Journal of Chemistry**

**2D-BCNO with Eu<sup>3+</sup>: Partial energy transfer and direct natural white light for LEDs**

**S. Sekar<sup>ab</sup>, S. Venkataprasad Bhat<sup>ac\*</sup>**

<sup>a</sup>SRM Research Institute, <sup>b</sup>Department of Chemistry, <sup>c</sup>Department of Physics &  
Nanotechnology,

SRM Institute of Science and Technology, Kancheepuram, Tamil Nadu, India, 603203.

\*Corresponding author; email: venkataprasad.b@res.srmuniv.ac.in, Tel: +91-44-27417907;

Fax: +91-44-2745670

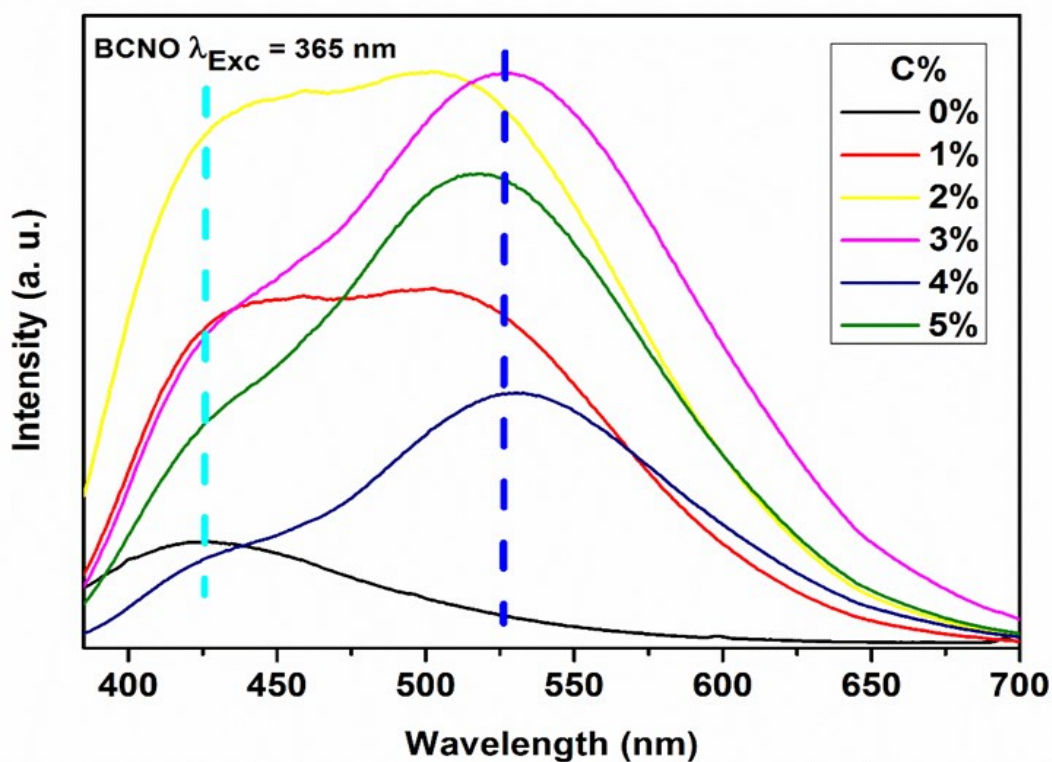

**Figure S1.** Photoluminescence emission Spectra of BCNO with different carbon concentration

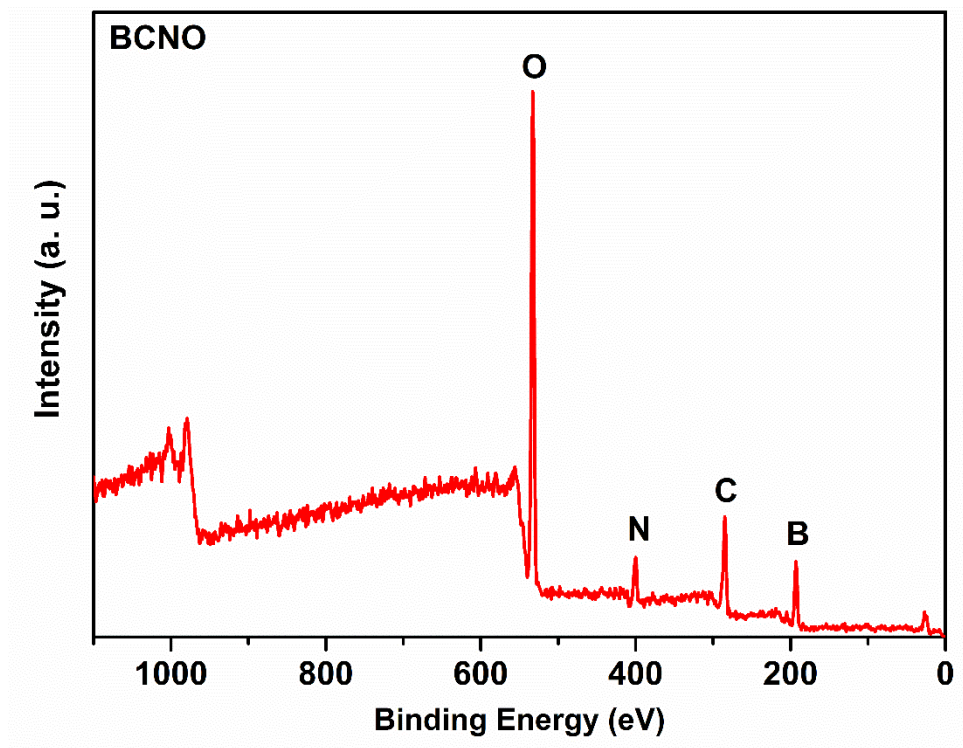

**Figure S2.** XPS survey scan spectrum of pristine BCNO

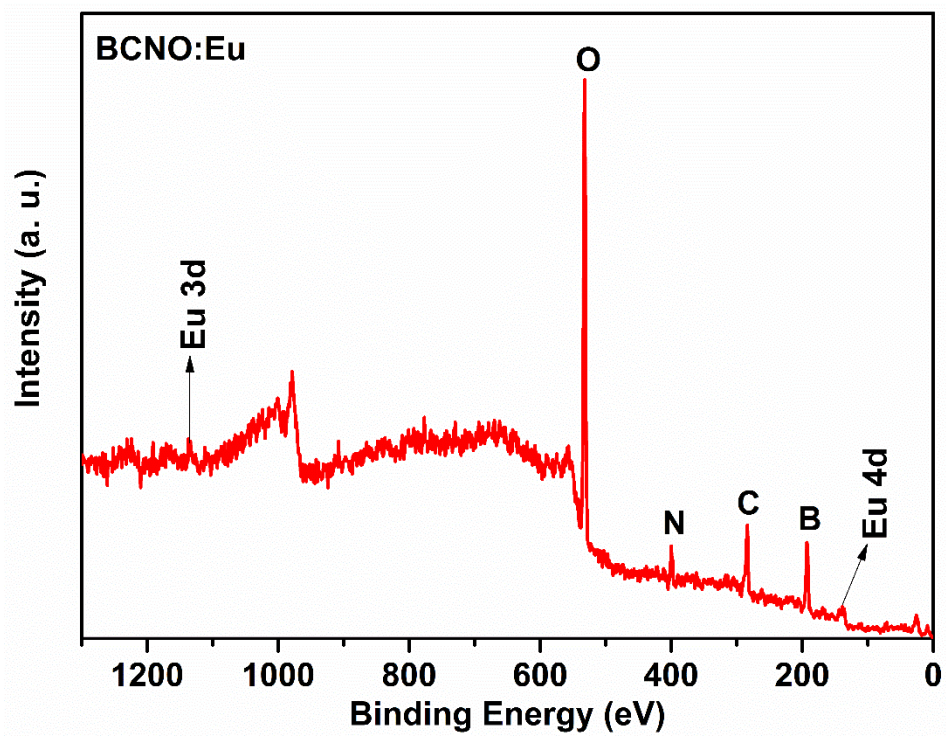

**Figure S3.** XPS survey scan spectrum of pristine BCNO: Eu

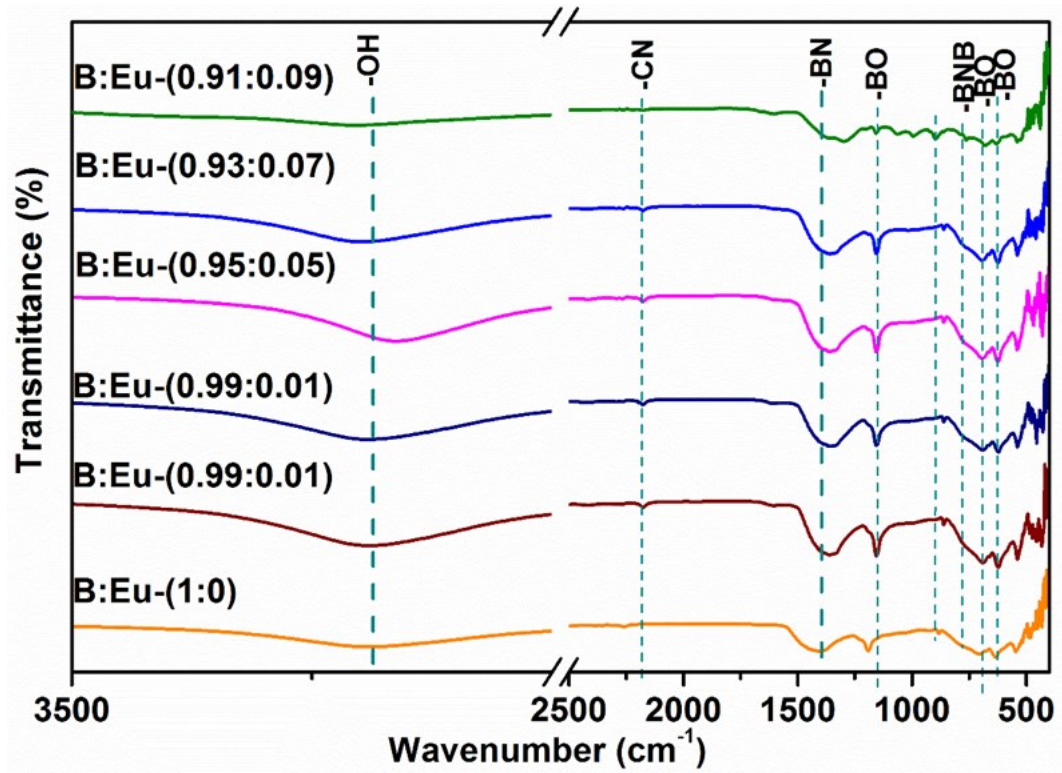

Figure S4. FTIR Spectra of BCNO and BCNO:Eu with different Eu<sup>3+</sup> concentration.

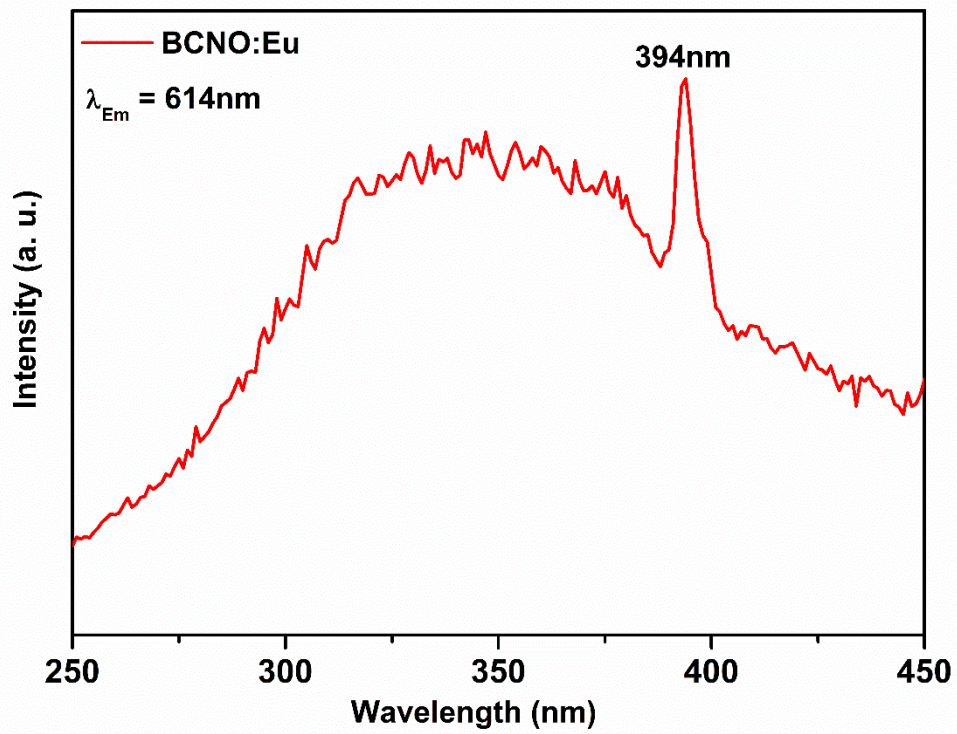

**Figure S5.** Photoluminescence excitation spectrum of BCNO: Eu under  $\lambda_{Em}=614\text{nm}$ .

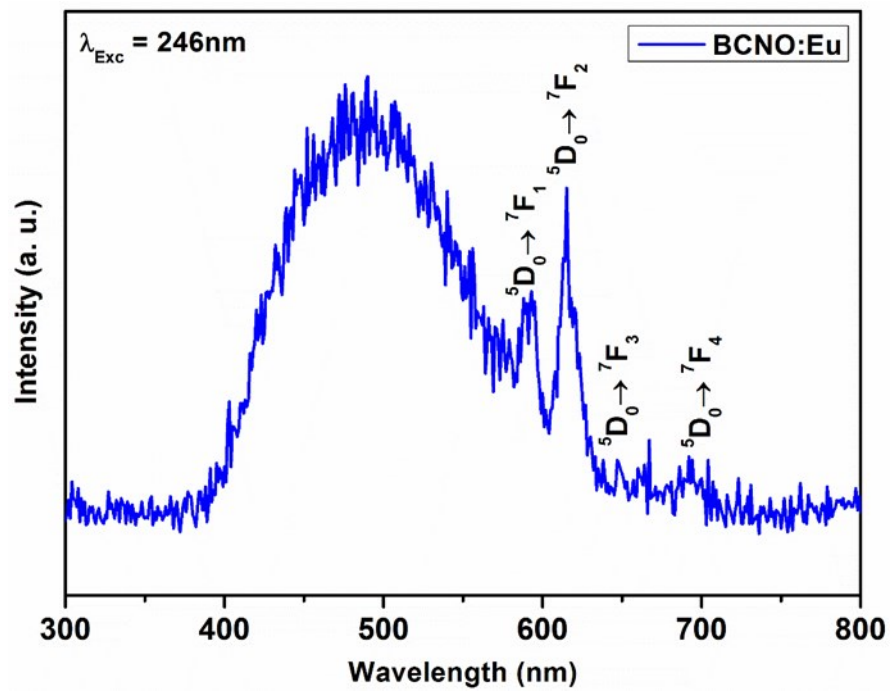

**Figure S6.** Photoluminescence emission spectrum of BCNO: Eu with  $\lambda_{\text{Exc}} = 246\text{nm}$ .

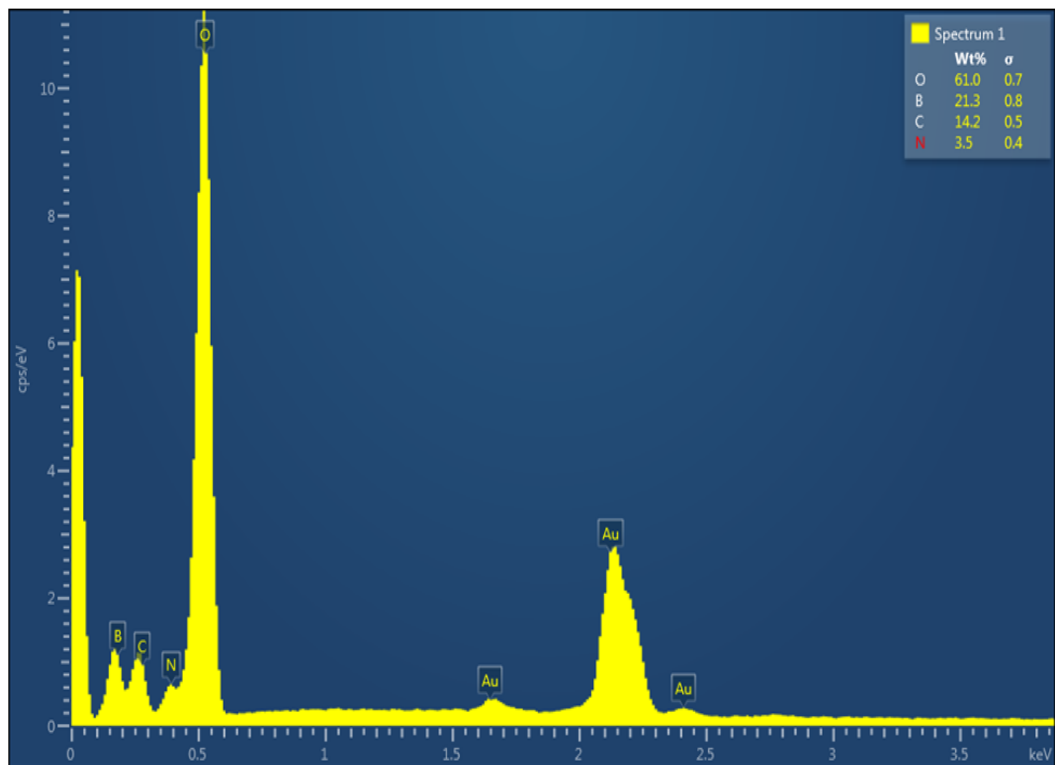

**Figure S7.** EDAX spectrum of 2D BCNO

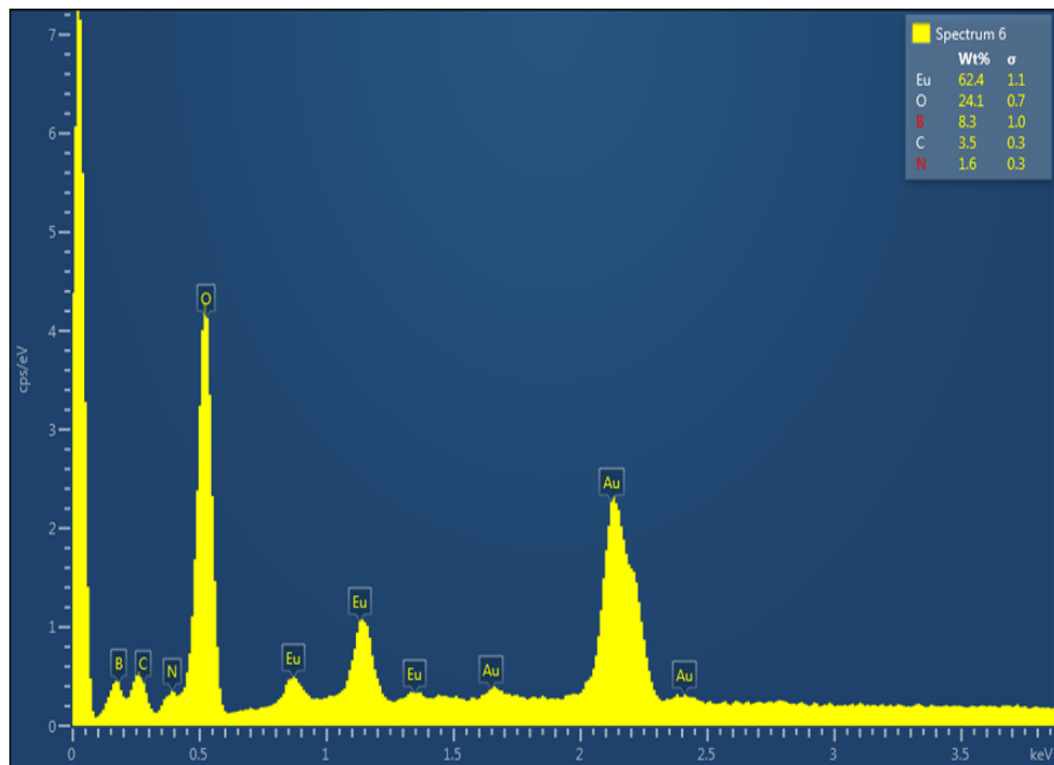

**Figure S8.** EDAX spectrum of 2D BCNO: Eu



**Table: S1**

Atomic percentage of constituent elements and composition of BCNO from SEM-EDX and XPS

| <b>Elements</b> | <b>Atomic percentage</b> |             | <b>Composition</b> |             |
|-----------------|--------------------------|-------------|--------------------|-------------|
|                 | <b>SEM-EDX</b>           | <b>XPS</b>  | <b>SEM-EDX</b>     | <b>XPS</b>  |
| <b>B</b>        | <b>27.92</b>             | <b>23.7</b> | <b>1</b>           | <b>1</b>    |
| <b>C</b>        | <b>17.26</b>             | <b>22.6</b> | <b>0.61</b>        | <b>0.85</b> |
| <b>N</b>        | <b>3.51</b>              | <b>6</b>    | <b>0.12</b>        | <b>0.19</b> |
| <b>O</b>        | <b>51.7</b>              | <b>47.6</b> | <b>1.85</b>        | <b>1.35</b> |

**Table: S2**

PL quantum efficiency of BCNO and BCNO: Eu samples recorded using  $\lambda_{\text{Exc}}= 365\text{nm}$

| <b>Compound</b>    | <b>Quantum yield (%)</b> |
|--------------------|--------------------------|
| <b>B:Eu</b>        |                          |
| <b>(1:0)</b>       | <b>28.93</b>             |
| <b>(0.99:0.01)</b> | <b>29.94</b>             |
| <b>(0.97:0.03)</b> | <b>26.50</b>             |
| <b>(0.95:0.05)</b> | <b>35.52</b>             |
| <b>(0.93:0.07)</b> | <b>54.85</b>             |
| <b>(0.91:0.09)</b> | <b>35.77</b>             |

Table: S3

Comparison of luminescence lifetime with energy transfer efficiency

| <b>Compound</b>    | <b><math>\tau_1</math>(ns)</b> | <b><math>\tau_2</math>(ns)</b> | <b><math>\tau_3</math>(ns)</b> | <b>Energy transfer efficiency (<math>\eta_T</math> %)</b> |
|--------------------|--------------------------------|--------------------------------|--------------------------------|-----------------------------------------------------------|
| <b>B:Eu</b>        |                                |                                |                                |                                                           |
| <b>(1:0)</b>       | <b>0.03346</b>                 | <b>3.32</b>                    | <b>10.32</b>                   |                                                           |
| <b>(0.99:0.01)</b> | <b>2.80</b>                    | <b>9.51</b>                    | <b>1.05</b>                    | <b>1.5%</b>                                               |
| <b>(0.97:0.03)</b> | <b>3.13</b>                    | <b>9.47</b>                    | <b>0.124</b>                   | <b>5.2%</b>                                               |
| <b>(0.95:0.05)</b> | <b>3.11</b>                    | <b>0.137</b>                   | <b>9.15</b>                    | <b>20.2%</b>                                              |
| <b>(0.93:0.07)</b> | <b>2.84</b>                    | <b>8.69</b>                    | <b>0.116</b>                   | <b>4.4%</b>                                               |
| <b>(0.91:0.09)</b> | <b>3.11</b>                    | <b>10.07</b>                   | <b>0.086</b>                   | <b>24.30%</b>                                             |
